# Supplementary material
Source: PubMed Central journal article supplement (PMC4156751)
Supplement: 1404881111_pnas.201404881SI.pdf [file 1404881111_pnas.201404881SI.pdf]

# Supporting Information

Tell and Horvath 10.1073/pnas.1404881111

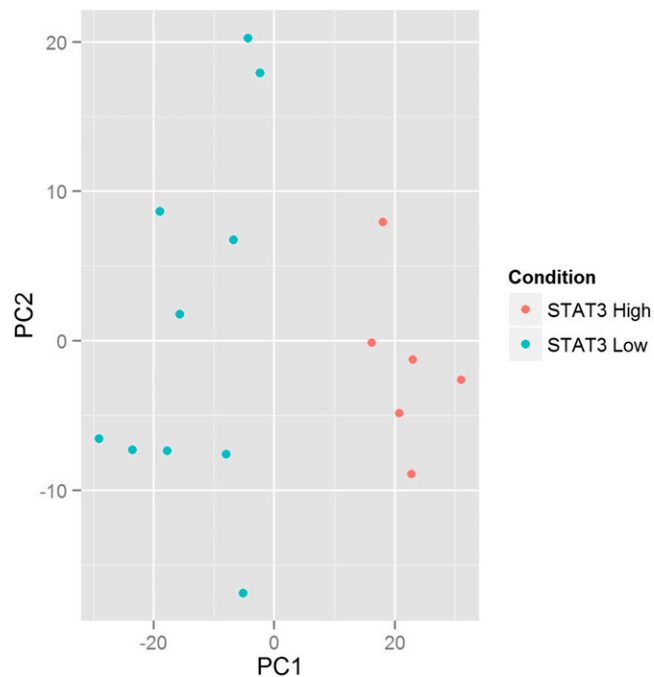

**Fig. S1.** Principal components analysis of differentially expressed genes detected in basal-like breast cancer. Genes differentially expressed when comparing STAT3 high (red) with STAT3 low (blue) patients were analyzed via principal components analysis to determine the overall difference in groups when comparing principal variance characteristics. Each patient is graphed along the component of highest variance on the x axis and the second highest variance on the y axis. Despite the smaller sample size of the basal-like group, the 438 differentially expressed genes clearly divide patients into separate sections of the graph as determined by the first principal component (PC).

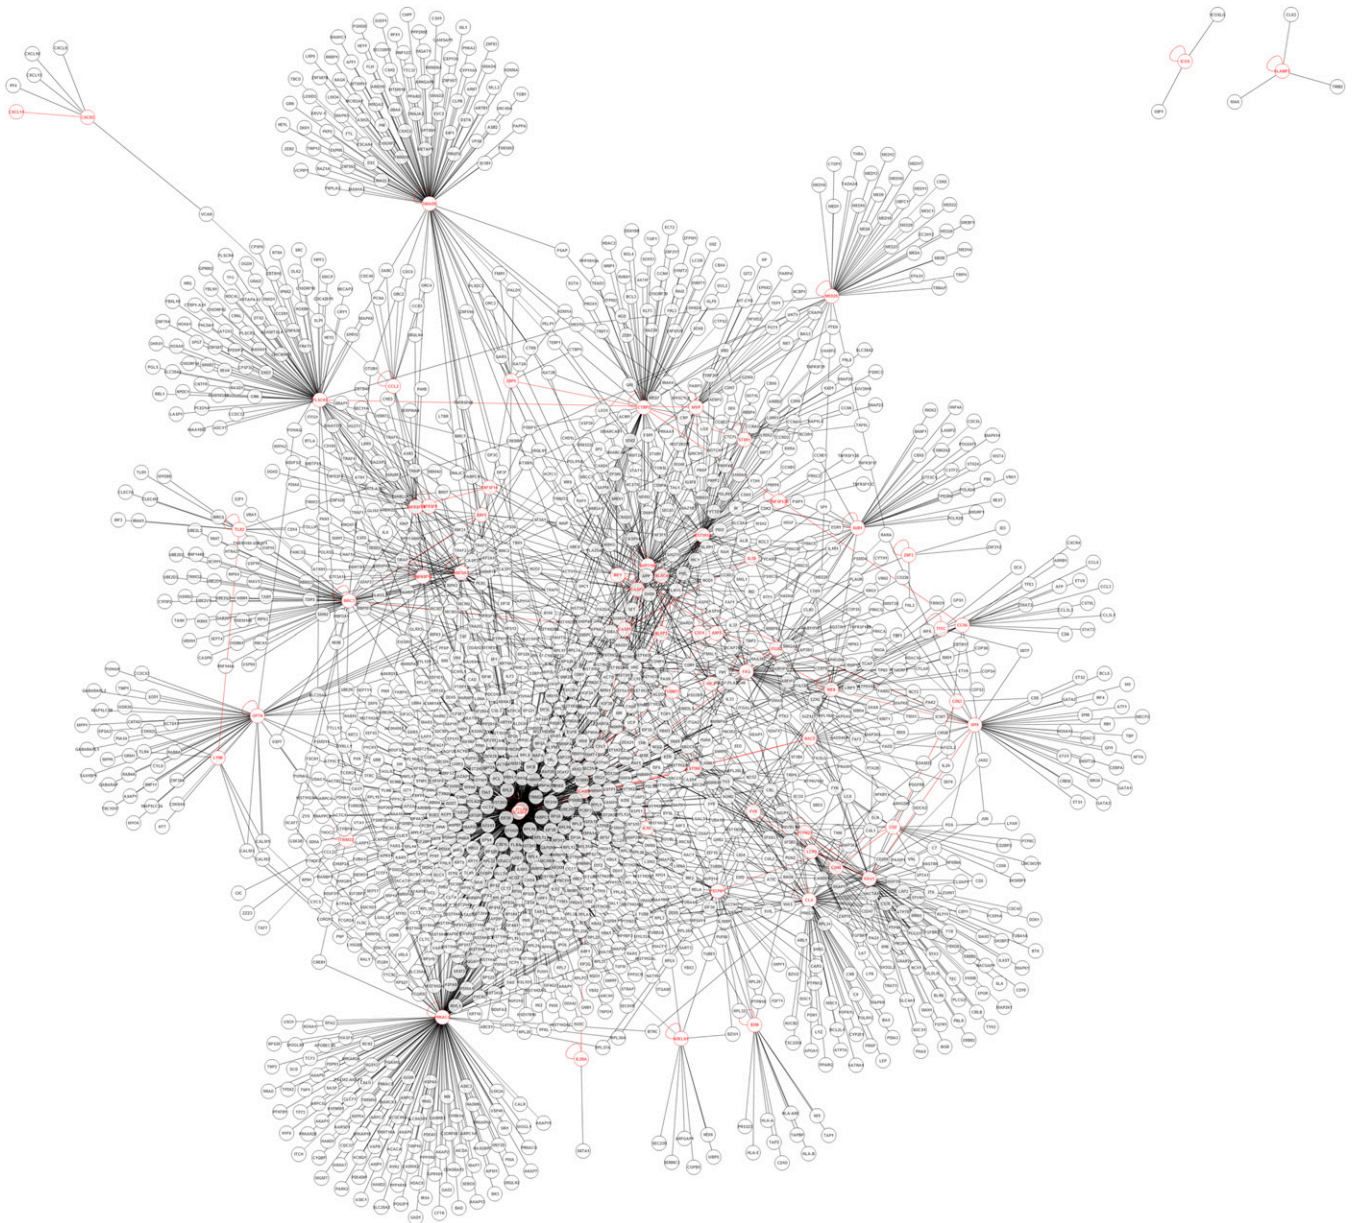

**Fig. S2.** Predicted protein interaction network for differentially expressed genes. Differentially expressed genes were analyzed for potential interactions via g:GOST in g:Profiler. Black lines indicate connections between genes not detected in the analysis, whereas red lines indicate known interactions between differentially expressed genes.



**Table S2. Differentially regulated microRNAs by breast cancer subtype with FDR-adjusted *P* value <0.1**

| microRNA          | Log <sub>2</sub> fold change | Cancer association                                               | Ref. |
|-------------------|------------------------------|------------------------------------------------------------------|------|
| <b>Luminal A</b>  |                              |                                                                  |      |
| hsa-mir-128-2     | 0.88                         | Mammary cell transformation                                      | (1)  |
| hsa-mir-128-1     | 0.74                         | p70S6K1 degradation                                              | (2)  |
| hsa-mir-483       | -1.23                        | Overexpressed in epithelial malignancies                         | (3)  |
| hsa-mir-224       | -1.4                         | Associated with colorectal cancer proliferation                  | (4)  |
| hsa-mir-1180      | 0.89                         | No direct evidence                                               |      |
| hsa-mir-145       | -0.88                        | Inhibition of lung cancer                                        | (5)  |
| hsa-mir-107       | 0.47                         | Cell-cycle arrest in lung cancer                                 | (6)  |
| hsa-mir-214       | -0.73                        | PTEN degradation in ovarian cancer                               | (7)  |
| hsa-mir-299       | -0.85                        | Degrades osteopontin in breast cancer                            | (8)  |
| hsa-mir-423       | 0.5                          | Promotes proliferation in hepatocellular carcinoma               | (9)  |
| <b>Luminal B</b>  |                              |                                                                  |      |
| hsa-mir-326       | 2.393873                     | MDR1 regulation in breast cancer                                 | (10) |
| hsa-mir-3677      | 1.899579                     | No direct evidence                                               |      |
| hsa-mir-92a-2     | 0.979293                     | Hepatocellular carcinoma development                             | (11) |
| hsa-mir-215       | 1.677733                     | Positive regulator of p53                                        | (12) |
| hsa-mir-760       | 1.946421                     | Plasma-level potential colorectal cancer biomarker               | (13) |
| <b>Basal-like</b> |                              |                                                                  |      |
| hsa-mir-375       | -3.05893                     | Associated with cervical cancer carcinogenesis                   | (14) |
| hsa-mir-183       | -1.9353                      | Alteration of cellular migration in breast cancer                | (15) |
| hsa-mir-3161      | 2.798385                     | No direct evidence                                               |      |
| hsa-mir-142       | 1.98575                      | Negative regulator of proliferation in pancreatic cancer         | (16) |
| hsa-mir-196a-2    | -2.17022                     | Polymorphism associated with cancer susceptibility               | (17) |
| hsa-mir-3690      | -1.48909                     | No direct evidence                                               |      |
| hsa-mir-150       | 1.398504                     | Promotes malignant behavior in breast cancer cells               | (18) |
| hsa-mir-20b       | -2.02197                     | Affects VEGF expression                                          | (19) |
| hsa-mir-182       | 1.758854                     | Potential breast cancer biomarker                                | (20) |
| hsa-mir-342       | 1.98575                      | Associated with HER2 expression                                  | (21) |
| hsa-mir-222       | 1.398886                     | Important for epithelial-mesenchymal transition in breast cancer | (22) |
| hsa-mir-3614      | 1.758854                     | No direct evidence                                               |      |
| hsa-mir-363       | -1.75518                     | Regulation of metastasis and tumorigenesis                       | (23) |

- Qian P, et al. (2012) Loss of SNAIL regulated miR-128-2 on chromosome 3p22.3 targets multiple stem cell factors to promote transformation of mammary epithelial cells. *Cancer Res* 72(22):6036–6050.
- Shi ZM, et al. (2012) MIR-128 inhibits tumor growth and angiogenesis by targeting p70S6K1. *PLoS ONE* 7(3):e32709.
- Veronese A, et al. (2010) Oncogenic role of miR-483-3p at the IGF2/483 locus. *Cancer Res* 70(8):3140–3149.
- Liao WT, et al. (2013) microRNA-224 promotes cell proliferation and tumor growth in human colorectal cancer by repressing PHLPP1 and PHLPP2. *Clin Cancer Res* 19(17):4662–4672.
- Cho WC, Chow AS, Au JS (2009) Restoration of tumour suppressor hsa-miR-145 inhibits cancer cell growth in lung adenocarcinoma patients with epidermal growth factor receptor mutation. *Eur J Cancer* 45(12):2197–2206.
- Takahashi Y, et al. (2009) MiR-107 and MiR-185 can induce cell cycle arrest in human non small cell lung cancer cell lines. *PLoS ONE* 4(8):e6677.
- Yang H, et al. (2008) MicroRNA expression profiling in human ovarian cancer: miR-214 induces cell survival and cisplatin resistance by targeting PTEN. *Cancer Res* 68(2):425–433.
- Shevde LA, et al. (2010) Spheroid-forming subpopulation of breast cancer cells demonstrates vasculogenic mimicry via hsa-miR-299-5p regulated de novo expression of osteopontin. *J Cell Mol Med* 14(6B):1693–1706.
- Lin J, et al. (2011) MicroRNA-423 promotes cell growth and regulates G(1)/S transition by targeting p21Cip1/Waf1 in hepatocellular carcinoma. *Carcinogenesis* 32(11):1641–1647.
- Liang Z, et al. (2010) Involvement of miR-326 in chemotherapy resistance of breast cancer through modulating expression of multidrug resistance-associated protein 1. *Biochem Pharmacol* 79(6):817–824.
- Shigoka M, et al. (2010) Deregulation of miR-92a expression is implicated in hepatocellular carcinoma development. *Pathol Int* 60(5):351–357.
- Song B, et al. (2010) Molecular mechanism of chemoresistance by miR-215 in osteosarcoma and colon cancer cells. *Mol Cancer* 9:96.
- Wang Q, et al. (2012) Plasma miR-601 and miR-760 are novel biomarkers for the early detection of colorectal cancer. *PLoS ONE* 7(9):e44398.
- Bierkens M, et al. (2013) Focal aberrations indicate EYA2 and hsa-miR-375 as oncogene and tumor suppressor in cervical carcinogenesis. *Genes Chromosomes Cancer* 52(1):56–68.
- Lowery AJ, Miller N, Dwyer RM, Kerin MJ (2010) Dysregulated miR-183 inhibits migration in breast cancer cells. *BMC Cancer* 10:502.
- MacKenzie TN, et al. (2013) Triptolide induces the expression of miR-142-3p: A negative regulator of heat shock protein 70 and pancreatic cancer cell proliferation. *Mol Cancer Ther* 12(7):1266–1275.
- Jedlinski DJ, Gabrowska PN, Weinstein SR, Smith RA, Griffiths LR (2011) Single nucleotide polymorphism in hsa-mir-196a-2 and breast cancer risk: A case control study. *Twin Res Human Genet* 14(5):417–421.
- Huang S, et al. (2013) miR-150 promotes human breast cancer growth and malignant behavior by targeting the pro-apoptotic purinergic P2X7 receptor. *PLoS ONE* 8(12):e80707.
- Cascio S, et al. (2010) miR-20b modulates VEGF expression by targeting HIF-1 alpha and STAT3 in MCF-7 breast cancer cells. *J Cell Physiol* 224(1):242–249.
- Wang PY, et al. (2013) Higher expression of circulating miR-182 as a novel biomarker for breast cancer. *Oncol Lett* 6(6):1681–1686.
- Leivonen SK, et al. (2014) High-throughput screens identify microRNAs essential for HER2 positive breast cancer cell growth. *Mol Oncol* 8(1):93–104.
- Chen WX, et al. (2013) miR-221/222: promising biomarkers for breast cancer. *Tumour Biol* 34(3):1361–1370.
- Qiao J, et al. (2013) miR-335 and miR-363 regulation of neuroblastoma tumorigenesis and metastasis. *Surgery* 154(2):226–233.

**Dataset S1.** Patient reverse-phase protein array data expressed as a z score for all patients analyzed for each cancer subtype

[Dataset S1](#)

**Dataset S2.** List of differentially expressed genes used in this study

[Dataset S2](#)
